# Supplementary material for: Influence of Ceramic Membrane Surface Characteristics on the Flux Behavior of a Complex Fermentation Broth
Source: MDPI journal article supplement (doi:10.3390/membranes11060402), 2021-05-28
Supplement: s1 [file s1]

*Supplementary Material*

# Influence of Ceramic Membrane Surface Characteristics on the Flux Behavior of a Complex Fermentation Broth

Nicolas A. P. Maguire <sup>1,2,3</sup>, Mehrdad Ebrahimi <sup>1</sup>, Rong Fan <sup>1,2,\*</sup>, Sabine Gießelmann <sup>4</sup>, Frank Ehlen <sup>4</sup>, Steffen Schütz <sup>4</sup> and Peter Czermak <sup>1,2,3,\*</sup>

<sup>1</sup> Institute of Bioprocess Engineering and Pharmaceutical Technology, University of Applied Sciences Mittelhessen, 35390 Giessen, Germany; nicolas.andrew.peter.maguire@lse.thm.de (N.A.P.M.); mehrdad.ebrahimi@lse.thm.de (M.E.)

<sup>2</sup> Fraunhofer Institute for Molecular Biology and Applied Ecology (IME), Project Group Bioresources, 35392 Giessen, Germany

<sup>3</sup> Faculty of Biology and Chemistry, Justus-Liebig University of Giessen, 35390 Giessen, Germany

<sup>4</sup> MANN+HUMMEL GmbH, 71636 Ludwigsburg, Germany; Sabine.Giesselmann@mann-hummel.com (S.G.); Frank.Ehlen@mann-hummel.com (F.E.); Steffen.Schuetz@mann-hummel.com (S.S.)

\* Correspondence: rong.fan@ime.fraunhofer.de (R.F.); peter.czermak@lse.thm.de (P.C.); Tel.: +49-641-972-19312 (R.F.); +49-641-309-2650/2551 (P.C.)

## S1. Supplementary Material

S1.1. Images of membranes 7C<sub>s</sub> and 7C<sub>r</sub> captured by light microscopy.

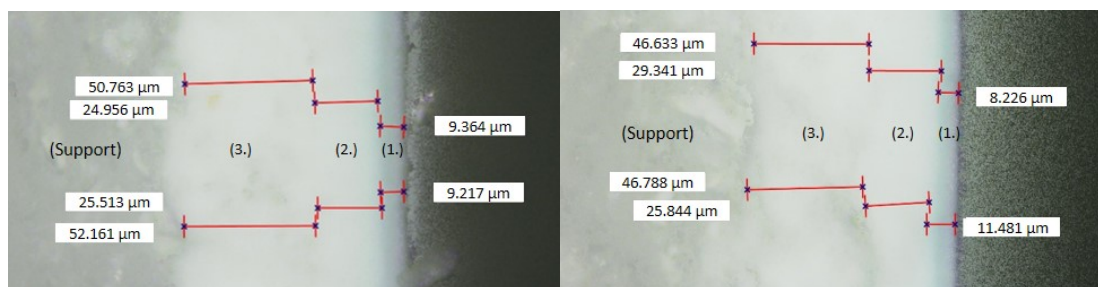

**Figure S1.** Images of two randomly selected segments of membrane 7C<sub>s</sub> at 50× magnification. The layers are named in parentheses.

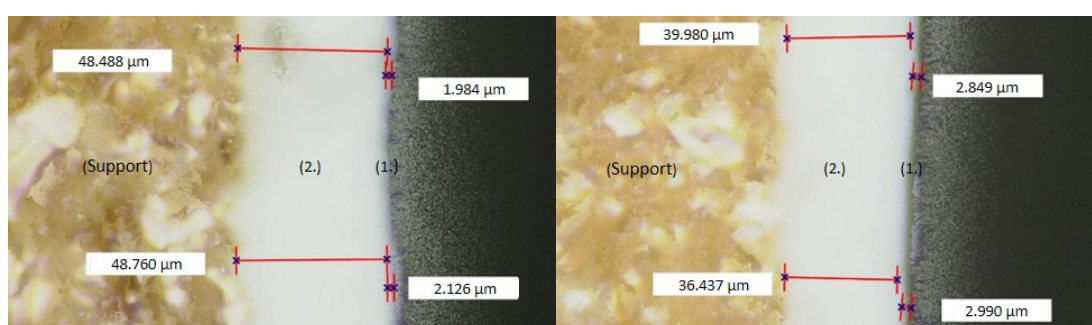

**Figure S2.** Images of two randomly selected segments of membrane 7C<sub>s</sub> at 50× magnification. The layers are named in parentheses.

## S1.2. Bradford assay and optical density data

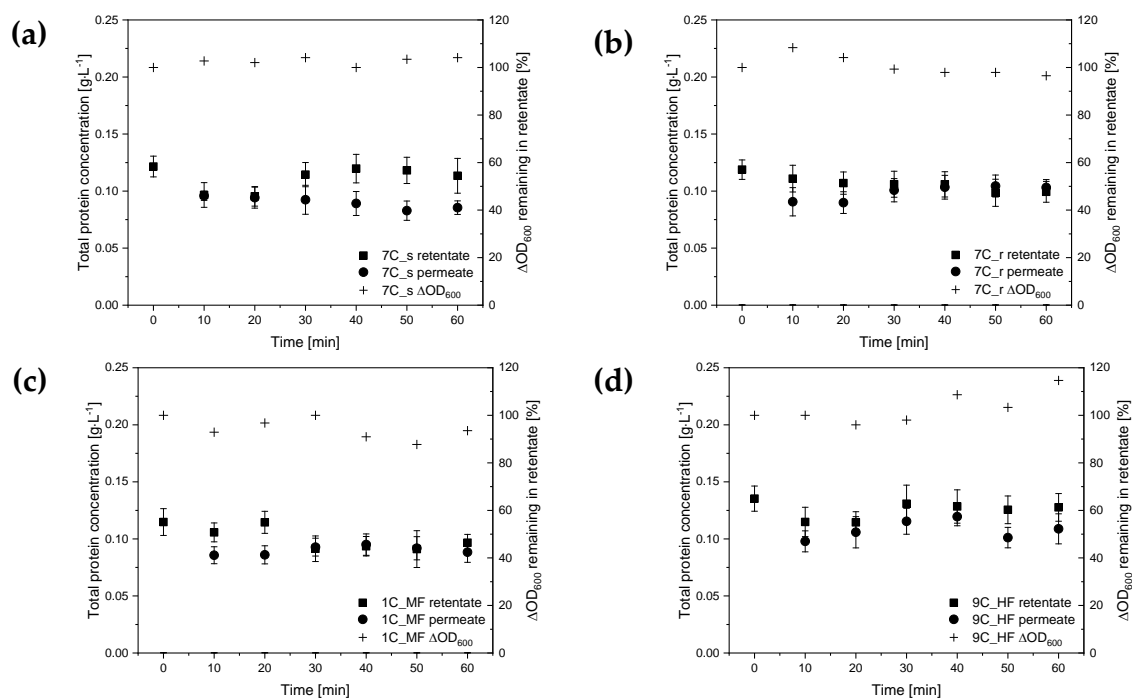

**Figure S3.** Bradford assay showing the amount of protein in the retentate and permeate and the remaining optical density in the retentate of the four membranes during the filtration of fermentation broth: (a) 7C\_s, (b) 7C\_r, (c) 1C\_MF, and (d) 9C\_HF.

S1.3. Calculated resistances caused by filtrations of fermentation broth, *K. lactis* cells and cell-free medium.

**Table S1.** Calculated resistances caused by the filtration of the fermentation broth. The values in parentheses correspond to the fraction of the total resistance. The sum of  $R_m$  and  $R_{ferm}$  corresponds to  $R_{ferm, tot}$ . The sum of the reversible and irreversible resistance results in  $R_{ferm}$ .

|                   | Resistance [ $1 \times 10^{12} \text{ m}^{-1}$ ] |             |             |             |
|-------------------|--------------------------------------------------|-------------|-------------|-------------|
|                   | 7C_s                                             | 7C_r        | 1C_MF       | 9C_HF       |
| $R_{ferm, tot}$   | 5.04 (100%)                                      | 5.52 (100%) | 5.38 (100%) | 3.81 (100%) |
| $R_m$             | 0.922 (19%)                                      | 0.350 (6%)  | 0.116 (2%)  | 0.993 (26%) |
| $R_{ferm}$        | 4.05 (81%)                                       | 5.17 (94%)  | 5.26 (98%)  | 2.82 (74%)  |
| $R_{ferm, irrev}$ | 1.90 (38%)                                       | 1.33 (24%)  | 0.120 (2%)  | 2.52 (66%)  |
| $R_{ferm, rev}$   | 2.14 (43%)                                       | 3.83 (70%)  | 5.14 (96%)  | 0.292 (8%)  |

$R_{ferm, tot}$  = total resistance;  $R_m$  = intrinsic membrane resistance;  $R_{ferm}$  = resistance due to fermentation broth;  $R_{ferm, irrev}$  = irreversible resistance fraction of  $R_{ferm}$ ;  $R_{ferm, rev}$  = reversible resistance fraction of  $R_{ferm}$ .

**Table S2.** Calculated resistances caused by the filtration of *K. lactis* cells. The values in parentheses correspond to the proportion of the total resistance. The sum of  $R_m$  and  $R_{yeast}$  corresponds to  $R_{yeast, tot}$ . The sum of the reversible and irreversible resistance results in  $R_{yeast}$ .

|                    | Resistance [ $1 \times 10^{12} \text{ m}^{-1}$ ] |             |
|--------------------|--------------------------------------------------|-------------|
|                    | 7C_s                                             | 7C_r        |
| $R_{yeast, tot}$   | 7.08 (100%)                                      | 8.79 (100%) |
| $R_m$              | 0.922 (13%)                                      | 0.350 (4%)  |
| $R_{yeast}$        | 6.15 (87%)                                       | 8.44 (96%)  |
| $R_{yeast, irrev}$ | 1.06 (15%)                                       | 1.31 (15%)  |
| $R_{yeast, rev}$   | 5.10 (72%)                                       | 7.14 (81%)  |

$R_{yeast, tot}$  = total resistance;  $R_m$  = intrinsic membrane resistance;  $R_{yeast}$  = resistance due to yeast components;  $R_{yeast, irrev}$  = irreversible resistance fraction of  $R_{yeast}$ ;  $R_{yeast, rev}$  = reversible resistance fraction of  $R_{yeast}$ .

**Table S3.** Calculated resistances caused by the filtration of cell-free medium. The values in parentheses correspond to the proportion of the total resistance. The sum of  $R_m$  and  $R_{medium}$  corresponds to  $R_{medium, tot}$ . The sum of the reversible and irreversible resistance results in  $R_{medium}$ .

|                     | Resistance [ $1 \times 10^{12} \text{ m}^{-1}$ ] |             |
|---------------------|--------------------------------------------------|-------------|
|                     | 7C_s                                             | 7C_r        |
| $R_{medium, tot}$   | 3.44 (100%)                                      | 3.08 (100%) |
| $R_m$               | 0.922 (27%)                                      | 0.350 (11%) |
| $R_{medium}$        | 2.52 (73%)                                       | 2.73 (89%)  |
| $R_{medium, irrev}$ | 1.73 (50%)                                       | 0.86 (28%)  |
| $R_{medium, rev}$   | 0.79 (23%)                                       | 1.87 (61%)  |

$R_{medium, tot}$  = total resistance;  $R_m$  = intrinsic membrane resistance;  $R_{medium}$  = resistance due to medium components;  $R_{medium, irrev}$  = irreversible resistance fraction of  $R_{medium}$ ;  $R_{medium, rev}$  = reversible resistance fraction of  $R_{medium}$ .
